# Supplementary material for: Inhibition of the UFD-1-NPL-4 complex triggers an aberrant immune response in Caenorhabditis elegans
Source: eLife. 2025 Sep 10;13:RP94310. doi: 10.7554/eLife.94310 (PMC12422736; doi:10.7554/eLife.94310)
Supplement: Figure 1—figure supplement 1—source data 1. [file elife-94310-fig1-figsupp1-data1.xlsx]

## Sheet: F1S1A
	EV	ufd-1	npl-4
	1	0.381124	0.943874
	1	0.252321	1.90968
	1	0.239263	1.73307
	1	0.220676	1.47768
Mean	1	0.2733	1.516
Std. Deviation	0	0.07302	0.4207

## Sheet: F1S1B
	EV	ufd-1	npl-4
	1	1.01748	0.263949
	1	0.725309	0.463294
	1	1.00463	0.612734
	1	0.928731	0.16532
Mean	1	0.919	0.3763
Std. Deviation	0	0.135	0.2005
