# Supplementary material for: Inhibition of the UFD-1-NPL-4 complex triggers an aberrant immune response in Caenorhabditis elegans
Source: eLife. 2025 Sep 10;13:RP94310. doi: 10.7554/eLife.94310 (PMC12422736; doi:10.7554/eLife.94310)
Supplement: Figure 1—figure supplement 2—source data 1. [file elife-94310-fig1-figsupp2-data1.xlsx]

## Sheet: F1S2A
	EV	ufd-1	npl-4
	156	163	160
	158	157	160
	150	156	97
	155	146	154
	161	158	160
	157	153	160
	161	158	158
	157	158	159
	159	155	162
	165	169	132
	164	163	160
	163	166	159
	160	152	159
	162	158	164
	161	137	166
	160	159	164
	158	163	167
	158	165	162
	157	164	161
	160	152	161
	157	144	163
	160	133	163
	157	153	160
	160	149	160
	163	154	159
	165	159	155
	162	161	157
	161	144	159
	166	151	156
	163	156	158
	146	149	141
	148	156	142
	151	147	148
	151	147	146
	151	143	133
	150	155	144
	147	148	146
	147	147	149
	157	149	147
	153	150	146
	152	150	148
	148	150	147
	148	150	149
	147	149	147
	146	143	148
Mean	156.4	153.1	153.2
Std. Deviation	5.941	7.663	12.04

## Sheet: F1S2B
	EV	ufd-1	npl-4
	150	150	156
	160	115	159
	165	158	115
	166	153	156
	165	155	163
	164	157	161
	168	154	155
	165	154	156
	171	158	156
	164	161	158
	169	155	146
	160	162	150
	166	72	161
	165	165	145
	164	136	156
	167	156	158
	162	162	159
	162	163	160
	164	154	158
	161	157	160
	161	161	159
	154	144	158
	164	153	160
	164	157	158
	163	161	157
	164	160	161
	159	156	163
	160	156	162
	160	155	158
	160	163	155
Mean	162.9	152.1	156
Std. Deviation	4.163	17.86	8.806

## Sheet: F1S2C
		EV	ufd-1	npl-4
		17	15	8
		16	13	10
		16	13	9
		16	13	13
		15	11	9
		17	9	8
		16	12	9
		16	10	16
		13	11	9
		16	9	16
		15	10	11
		12	7	9
		11	13
	Mean	15.08	11.23	10.58
	Std. Deviation	1.891	2.204	2.875

## Sheet: F1S2D
F
		EV	ufd-1	npl-4
		10	5	6
		10	3	8
		8	5	4
		9	4	5
		6	1	4
		13	5	5
		9	9	7
		11	4	9
		8	5	5
		11		2
	Mean	9.5	4.556	5.5
	Std. Deviation	1.958	2.128	2.068
