# Supplementary material for: Inhibition of the UFD-1-NPL-4 complex triggers an aberrant immune response in Caenorhabditis elegans
Source: eLife. 2025 Sep 10;13:RP94310. doi: 10.7554/eLife.94310 (PMC12422736; doi:10.7554/eLife.94310)
Supplement: Figure 1—source data 1. [file elife-94310-fig1-data1.xlsx]

## Sheet: Figure-1A
	Experiment #	Strain	Genotype	RNAi	Mean survival(hours)	# Deaths/total before censoring	Control for comparison	p value with respect to control	% Survival extension (compared to control)
				EV	58.6	78/90
				ufd-1	35.4	78/90	EV	<0.0001	-39.5904
	1	N2		npl-4	27.7	89/90	EV	<0.0001	-52.7304
				EV	61.03	75/90
	2	N2		ufd-1	30.9	81/90	EV	<0.0001	-49.3692
				npl-4	25.3	86/90	EV	<0.0001	-58.545
				EV	56.5	74/90
	3	N2		ufd-1	35.8	86/90	EV	<0.0001	-36.6372
				npl-4	34.2	84/90	EV	<0.0001	-39.469

## Sheet: Figure-1B
	Experiment #	Strain	Genotype	RNAi	Mean survival(days)	# Deaths/total before censoring	Control for comparison	p value with respect to control	% Survival extension (compared to control)
				EV	14.4	86/86
	1	N2		ufd-1	7.2	73/78	EV	<0.0001	-50
				npl-4	7.8	75/77	EV	<0.0001	-45.8333
				EV	12.9	80/80
	2	N2		ufd-1	7	73/80	EV	<0.0001	-45.7364
				npl-4	7.4	67/70	EV	<0.0001	-42.6357
				EV	14.2	77/77
	3	N2		ufd-1	6.01	73/73	EV	<0.0001	-57.6761
				npl-4	7.5	85/85	EV	<0.0001	-47.1831

## Sheet: Figure-1D
					EV	ufd-1	npl-4
					48.5982	38.964	27.8654
					119.88	25.8626	30.7401
					46.1311	26.2508	22.462
					95.6621	50.4513	23.5899
					58.72	25.7087	22.7024
					59.4387	26.2877	22.8774
					64.8602	35.3008	29.1169
					39.2428	20.1785	36.231
					84.8607	42.77	19.8819
					43.0625	31.4098	25.7426
					43.5037	51.3498	21.5282
					62.5647	52.0705	30.8109
					58.1012	43.3289	24.185
					50.4554	34.6519	26.5594
					54.7811	34.1786	29.0504
					59.5104	40.9754	23.4718
				Mean	61.84	36.23	26.05
				Std. Deviation	21.43	10.03	4.314

## Sheet: Figure-1E
					EV	ufd-1	npl-4
					214500	76500	52500
					81000	54000	27000
					165000	70500	10950
					105000	54000	15150
					76500	17250	10725
					127500	25000	85500
				Mean	128250	49542	33638
				Std. Deviation	53369	23878	29903
