# Supplementary material for: Inhibition of the UFD-1-NPL-4 complex triggers an aberrant immune response in Caenorhabditis elegans
Source: eLife. 2025 Sep 10;13:RP94310. doi: 10.7554/eLife.94310 (PMC12422736; doi:10.7554/eLife.94310)
Supplement: Figure 2—figure supplement 1—source data 1. [file elife-94310-fig2-figsupp1-data1.xlsx]

## Sheet: F2S1A
	Experiment #	Strain	Genotype	RNAi	Mean survival(hours)	# Deaths/total before censoring	Control for comparison	p value with respect to control	% Survival extension (compared to control)
	1		AGD927	EV	44.9	88/91	EV
			AGD927	ufd-1	38.5	87/88		<0.0001	-14.2539
	2		AGD927	EV	46.12	86/87	EV
			AGD927	ufd-1	39.4	87/88		0.0007	-14.5707
	3		AGD927	EV	49.6	83/89	EV
			AGD927	ufd-1	41	87/90		<0.0001	-17.3387

## Sheet: F2S1C
					AGD927
					EV	ufd-1
					56.7647	32.6582
					93.9903	52.3623
					114.346	65.0633
					122.862	42.2514
					140.077	39.7788
					122.023	55.5186
					129.961	52.7872
					141.019	45.4068
					59.8961	40.9385
					69.1017	68.5332
					154.958	45.7229
					91.139	51.6906
					137.214	63.3499
					127.849	49.2493
					111.961	76.6946
					161.299	103.397
					122.588	50.7244
					115.365	59.5483
					84.5365	55.949
					89.9733	75.1409
					72.8412	66.3174
					74.0279	61.6781
					65.974	77.1886
					39.3275	113.126
					82.7422	84.4946
					116.666	60.3116
					58.7587	46.5032
					84.3597	51.6486
					31.3186	60.7614
					87.8037	72.3561
				Mean	98.69	60.71
				Std. Deviation	34.09	17.93
