# Supplementary material for: Inhibition of the UFD-1-NPL-4 complex triggers an aberrant immune response in Caenorhabditis elegans
Source: eLife. 2025 Sep 10;13:RP94310. doi: 10.7554/eLife.94310 (PMC12422736; doi:10.7554/eLife.94310)
Supplement: Figure 2—source data 1. [file elife-94310-fig2-data1.xlsx]

## Sheet: Figure-2A
	Experiment #	Strain	Genotype	RNAi	Mean survival(hours)	# Deaths/total before censoring	Control for comparison	p value with respect to control	% Survival extension (compared to control)
	1		xbp-1(tm2482)	EV	38.6	71/90
			xbp-1(tm2482)	ufd-1	38.6	62/90	EV	0.8396	0
	2		xbp-1(tm2482)	EV	36.8	72/90
			xbp-1(tm2482)	ufd-1	32.8	77/90	EV	0.6745	-10.8696
	3		xbp-1(tm2482)	EV	38.5	75/90
			xbp-1(tm2482)	ufd-1	38.5	80/90	EV	0.6961	0

## Sheet: Figure-2C
								xbp-1(tm2482)
								EV	ufd-1
								31.8591	16.2383
								30.1586	16.8572
								11.9067	17.6074
								19.3182	15.5749
								44.5002	14.6201
								74.4198	15.8303
								26.9432	33.1237
								49.8377	17.2538
								26.4012	8.61353
								43.2371	8.0553
								20.9776	7.5962
								14.3042	7.48116
								14.4078	8.28825
								23.7474	8.41461
								22.5597	9.89979
								13.6154	14.0614
							Mean	29.26	13.72
							Std. Deviation	16.62	6.511

## Sheet: Figure-2D
	Experiment #	Strain	Genotype	RNAi	Mean survival(hours)	# Deaths/total before censoring	Control for comparison	p value with respect to control	% Survival extension (compared to control)
	1	RB772	atf-6(ok551)	EV	45.16	51/90
		RB772	atf-6(ok551)	ufd-1	37.5	75/90	EV	<0.0001	-16.9619
	2	RB772	atf-6(ok551)	EV	52.11	80/90
		RB772	atf-6(ok551)	ufd-1	35.6	85/90	EV	<0.0001	-31.683
	3	RB772	atf-6(ok551)	EV	55.5	75/90
		RB772	atf-6(ok551)	ufd-1	21.5	90/90	EV	<0.0001	-61.2613

## Sheet: Figure-2F
						atf-6(ok551)
						EV	ufd-1
						47.1008	25.0207
						51.6329	23.3807
						27.0105	27.333
						24.4687	23.3312
						33.5206	26.1399
						28.92	28.8645
						29.3342	22.0347
						40.275	26.3822
						37.2797	33.3837
						54.168	23.7823
						31.3936	30.7265
						26.0723	22.5127
						33.331	22.9916
						31.6473	28.2927
						31.2287	21.4119
						34.4894	25.3412
					Mean	35.12	25.68
					Std. Deviation	8.909	3.356

## Sheet: Figure-2G
	Experiment #	Strain	Genotype	RNAi	Mean survival(hours)	# Deaths/total before censoring	Control for comparison	p value with respect to control	% Survival extension (compared to control)
	1	RB545	pek-1(ok275)	EV	50.5	53/60
		RB545	pek-1(ok275)	ufd-1	37.5	80/90	EV	<0.0001	-25.7426
	2	RB545	pek-1(ok275)	EV	45.6	79/60
		RB545	pek-1(ok275)	ufd-1	39.3	82/90	EV	0.0006	-13.8158
	3	RB545	pek-1(ok275)	EV	61.5	82/90
		RB545	pek-1(ok275)	ufd-1	41.5	87/90	EV	<0.0001	-32.5203

## Sheet: Figure-2I
					pek-1(ok275)
					EV	ufd-1
					17.8217	24.664
					65.2643	13.5818
					36.0277	13.33
					29.2965	11.5587
					37.3306	14.6989
					69.1273	21.003
					15.1229	19.2776
					82.7369	16.9447
					38.2732	17.5971
					33.1168	17.9396
					43.4599	20.262
					28.2594	21.2363
					33.6537	28.6928
					47.6061	18.4464
					47.2564	26.2641
					46.5886	21.3779
					34.94	24.003
					18.7732	19.0559
					31.7387	16.1441
					34.1266	25.3326
					41.0327	27.7475
					31.9569	17.5659
					42.4633	15.7898
					43.8953	15.5207
					47.9319
				Mean	39.91	19.5
				Std. Deviation	15.39	4.692
