# Supplementary material for: Inhibition of the UFD-1-NPL-4 complex triggers an aberrant immune response in Caenorhabditis elegans
Source: eLife. 2025 Sep 10;13:RP94310. doi: 10.7554/eLife.94310 (PMC12422736; doi:10.7554/eLife.94310)
Supplement: Figure 3—figure supplement 1—source data 1. [file elife-94310-fig3-figsupp1-data1.xlsx]

## Sheet: Figure-3A
		Experiment #	Strain	Genotype	RNAi	Mean survival(hours)	# Deaths/total before censoring	Control for comparison	p value with respect to control	% Survival extension (compared to control)
		1	KU25	pmk-1(km25)	EV	32.4	83/90
			KU25	pmk-1(km25)	ufd-1	35.02	90/90	EV	0.9068	8.08642
		2	KU25	pmk-1(km25)	EV	29.8	90/90
			KU25	pmk-1(km25)	ufd-1	31.8	90/90	EV	0.016	6.71141
		3	KU25	pmk-1(km25)	EV	32.2	90/90
			KU25	pmk-1(km25)	ufd-1	32.2	90/90	EV	0.4697	0

## Sheet: Figure-3D
		Experiment #	Strain	Genotype	RNAi	Mean survival(hours)	# Deaths/total before censoring	Control for comparison	p value with respect to control	% Survival extension (compared to control)
		1	NU3	dbl-1(nk3)	EV	40.9	90/90
			NU3	dbl-1(nk3)	ufd-1	40.9	90/90	EV	0.5368	0
		2	NU3	dbl-1(nk3)	EV	41.4	70/90
			NU3	dbl-1(nk3)	ufd-1	40.3	52/60	EV	0.4712	-2.657
		3	NU3	dbl-1(nk3)	EV	30.11	88/90
			NU3	dbl-1(nk3)	ufd-1	32.3	88/90	EV	0.4409	7.27333

## Sheet: F3S1A
		Experiment #	Strain	Genotype	RNAi	Mean survival(hours)	# Deaths/total before censoring	Control for comparison	p value with respect to control	% Survival extension (compared to control)
				tir-1(qd4)	EV	50.9	54/90
				tir-1(qd4)	ufd-1	44.8	60/90	EV	0.6263	-11.9843
				tir-1(qd4)	EV	41.88	66/90
				tir-1(qd4)	ufd-1	41.88	80/90	EV	0.5895	0
				tir-1(qd4)	EV	38.8	74/90
				tir-1(qd4)	ufd-1	40.7	83/90	EV	0.2425	4.89691

## Sheet: F3S1B
					tir-1(qd4)
					EV	ufd-1
					41.2915	34.5444
					51.7096	24.8317
					58.3701	33.9481
					46.7697	35.1003
					57.0577	29.8355
					68.8522	27.6834
					53.0694	30.5617
					85.0521	27.0037
					45.3833	34.6738
					69.5964	28.0592
					31.5154	31.4881
					44.3945	38.9529
					43.0938	34.176
					32.9887	31.9218
					40.3978	23.7195
					47.6608	35.63
					46.6963	25.7751
					31.1714	28.3322
					33.9455	27.0798
					46.5225
				Mean	48.78	30.7
				Std. Deviation	13.81	4.241
