# Supplementary material for: Inhibition of the UFD-1-NPL-4 complex triggers an aberrant immune response in Caenorhabditis elegans
Source: eLife. 2025 Sep 10;13:RP94310. doi: 10.7554/eLife.94310 (PMC12422736; doi:10.7554/eLife.94310)
Supplement: Figure 3—source data 1. [file elife-94310-fig3-data1.xlsx]

## Sheet: Figure-3A
		Experiment #	Strain	Genotype	RNAi	Mean survival(hours)	# Deaths/total before censoring	Control for comparison	p value with respect to control	% Survival extension (compared to control)
		1	KU25	pmk-1(km25)	EV	32.4	83/90
			KU25	pmk-1(km25)	ufd-1	35.02	90/90	EV	0.9068	8.08642
		2	KU25	pmk-1(km25)	EV	29.8	90/90
			KU25	pmk-1(km25)	ufd-1	31.8	90/90	EV	0.016	6.71141
		3	KU25	pmk-1(km25)	EV	32.2	90/90
			KU25	pmk-1(km25)	ufd-1	32.2	90/90	EV	0.4697	0

## Sheet: Figure-3C
					pmk-1(km25)
					EV	ufd-1
					76.3127	35.2463
					72.5238	53.3314
					84.3212	36.256
					110.872	42.4144
					85.25	39.8886
					105.725	45.1234
					87.2306	49.047
					96.0175	36.7641
					64.0655	24.4804
					106.017	17.7168
					121.619	30.5495
					91.4502	16.9557
					47.6478	25.258
					108.981	16.8668
					97.3579	19.8422
					127.472	22.9267
				Mean	92.68	32.04
				Std. Deviation	21.14	11.93

## Sheet: Figure-3D
		Experiment #	Strain	Genotype	RNAi	Mean survival(hours)	# Deaths/total before censoring	Control for comparison	p value with respect to control	% Survival extension (compared to control)
		1	NU3	dbl-1(nk3)	EV	40.9	90/90
			NU3	dbl-1(nk3)	ufd-1	40.9	90/90	EV	0.5368	0
		2	NU3	dbl-1(nk3)	EV	41.4	70/90
			NU3	dbl-1(nk3)	ufd-1	40.3	52/60	EV	0.4712	-2.657
		3	NU3	dbl-1(nk3)	EV	30.11	88/90
			NU3	dbl-1(nk3)	ufd-1	32.3	88/90	EV	0.4409	7.27333

## Sheet: Figure-3F
					dbl-1(nk3)
					EV	ufd-1
					25.5498	13.9579
					14.02	17.5531
					38.3409	14.8118
					43.3871	19.7105
					26.2534	16.9161
					23.8955	18.5984
					47.6082	19.1777
					25.8365	20.478
					14.322	15.1341
					27.0511	11.7276
					28.7642	11.5763
					26.6627	11.5592
					13.4087	13.2775
					33.522	10.8258
					19.1163	19.3322
					21.1933	14.3793
				Mean	26.81	15.56
				Std. Deviation	9.968	3.293

## Sheet: Figure-3G
		Experiment #	Strain	Genotype	RNAi	Mean survival(hours)	# Deaths/total before censoring	Control for comparison	p value with respect to control	% Survival extension (compared to control)
		1	JIN1375	hlh-30(tm1978)	EV	37.9	90/90
			JIN1375	hlh-30(tm1978)	ufd-1	33.9	88/90	EV	0.0936	-10.5541
		2	JIN1375	hlh-30(tm1978)	EV	37.77	87/90
			JIN1375	hlh-30(tm1978)	ufd-1	34.04	90/90	EV	0.0696	-9.87556
		3	JIN1375	hlh-30(tm1978)	EV	46	73/90
			JIN1375	hlh-30(tm1978)	ufd-1	41.4	88/90	EV	0.0001	-10

## Sheet: Figure-3I
					hlh-30(tm1978)
					EV	ufd-1
					27.8331	3.69222
					17.1054	5.96974
					28.1953	8.40153
					24.4785	2.566
					35.1377	5.62827
					27.6893	4.37044
					12.8364	4.601
					22.9443	6.42431
					20.8703	13.384
					21.687	14.1121
					28.9342	13.4253
					32.4424	16.4507
					24.6821	26.4584
					32.687	16.9922
					10.8648	13.7436
					15.8403	16.665
				Mean	24.01	10.81
				Std. Deviation	7.161	6.614
