# Supplementary material for: Inhibition of the UFD-1-NPL-4 complex triggers an aberrant immune response in Caenorhabditis elegans
Source: eLife. 2025 Sep 10;13:RP94310. doi: 10.7554/eLife.94310 (PMC12422736; doi:10.7554/eLife.94310)
Supplement: Figure 4—source data 1. [file elife-94310-fig4-data1.xlsx]

## Sheet: Figure-4A
		Experiment #	Strain	Genotype	RNAi	Mean survival(hours)	# Deaths/total before censoring	Control for comparison	p value with respect to control	% Survival extension (compared to control)
		1	KU4	sek-1(km4)	EV	11.8	90/90
			KU4	sek-1(km4)	ufd-1	26.8	90/90	EV	<0.0001	127.119
			KU4	sek-1(km4)	npl-4	26.8	90/90	EV	<0.0001	127.119
		2	KU4	sek-1(km4)	EV	10.93	90/90
			KU4	sek-1(km4)	ufd-1	25.3	90/90	EV	<0.0001	131.473
			KU4	sek-1(km4)	npl-4	29.06	90/90	EV	<0.0001	165.874
		3	KU4	sek-1(km4)	EV	9.64	90/90
			KU4	sek-1(km4)	ufd-1	23.1	90/90	EV	<0.0001	139.627
			KU4	sek-1(km4)	npl-4	36.4	89/90	EV	<0.0001	277.593
		4	KU4	sek-1(km4)	EV	10.9	75/75
			KU4	sek-1(km4)	ufd-1	30.9	75/75	EV	<0.0001	183.486
			KU4	sek-1(km4)	npl-4	26.4	75/75	EV	<0.0001	142.202
		5	KU4	sek-1(km4)	EV	14.11	88/90
			KU4	sek-1(km4)	ufd-1	29.8	90/90	EV	<0.0001	111.198
			KU4	sek-1(km4)	npl-4	34.04	90/90	EV	<0.0001	141.247

## Sheet: Figure-4C
				sek-1(km4)
				EV	ufd-1	npl-4
				38.9457	28.9559	19.6441
				71.2392	20.6545	17.0728
				72.0177	21.579	18.2398
				95.9967	24.4169	16.8869
				70.1232	30.8391	13.6838
				48.967	44.1367	23.8743
				35.1806	26.1771	20.5151
				66.8083	23.0114	18.6157
				66.4192	20.4507	18.4657
				101.887	23.2561	16.4633
				66.9808	29.2617	14.6351
				46.3182	35.4598	27.2484
				137.579	19.1173	22.9601
				163.749	11.9747	25.919
				115.957	14.915	18.8395
				155.585	15.234	19.7209
				93.4257	12.5651	19.1974
				157.077	14.2232	20.9447
				89.3104	19.0379	26.4126
					15.4459	19.2437
			Mean	89.14	22.54	19.93
			Std. Deviation	40.31	8.211	3.721

## Sheet: Figure-4D
		Experiment #	Strain	Genotype	RNAi	Mean survival(days)	# Deaths/total before censoring	Control for comparison	p value with respect to control	% Survival extension (compared to control)
		1	KU4	sek-1(km4)	EV	17.01	63/63
			KU4	sek-1(km4)	ufd-1	7.93	87/89	EV	<0.0001	-53.3804
			KU4	sek-1(km4)	npl-4	7.4	87/87	EV	<0.0001	-56.4962
		2	KU4	sek-1(km4)	EV	16.9	76/76
			KU4	sek-1(km4)	ufd-1	6.54	67/67	EV	<0.0001	-61.3018
			KU4	sek-1(km4)	npl-4	6.88	78/78	EV	<0.0001	-59.2899
		3	KU4	sek-1(km4)	EV	16.1	64/64
			KU4	sek-1(km4)	ufd-1	6.4	55/56	EV	<0.0001	-60.2484
			KU4	sek-1(km4)	npl-4	8.09	55/60	EV	<0.0001	-49.7516
		4	KU4	sek-1(km4)	EV	15.68	60/60
			KU4	sek-1(km4)	ufd-1	7.98	90/90	EV	<0.0001	-49.1071
			KU4	sek-1(km4)	npl-4	8.44	82/82	EV	<0.0001	-46.1735

## Sheet: Figure-4E
		Experiment #	Strain	Genotype	RNAi	Mean survival(hours)	# Deaths/total before censoring	Control for comparison	p value with respect to control	% Survival extension (compared to control)
			1	dbl-1(nk3);pmk-1(km25)	EV	17.77	90/90
				dbl-1(nk3);pmk-1(km25)	ufd-1	26.13	88/90	EV	<0.0001	47.0456
			2	dbl-1(nk3);pmk-1(km25)	EV	18.13	90/90
				dbl-1(nk3);pmk-1(km25)	ufd-1	27.7	86/90	EV	<0.0001	52.7854
			3	dbl-1(nk3);pmk-1(km25)	EV	17.77	90/90
				dbl-1(nk3);pmk-1(km25)	ufd-1	26.4	89/90	EV	<0.0001	48.565

## Sheet: Figure-4G
				dbl-1(nk3);pmk-1(km25)
				EV	ufd-1
				35.5265	14.6366
				37.2578	12.671
				16.1801	16.0106
				32.3892	22.2113
				50.0117	26.3347
				43.237	14.4121
				36.816	33.7667
				49.8055	16.8939
				30.3634	16.8492
				53.4818	13.8429
				31.0717	15.7558
				46.657	16.4121
				36.3525	9.79794
				37.8022	12.1484
				42.1693	27.5441
				35.3152	14.0714
				31.3547	12.5395
				57.6112	13.425
				11.6601	16.5756
				36.6419	9.62954
				36.2029	10.0353
				56.7087	21.2708
				55.902	17.3314
				63.1676	10.6597
			Mean	40.15	16.45
			Std. Deviation	12.5	5.976
