# Supplementary material for: Inhibition of the UFD-1-NPL-4 complex triggers an aberrant immune response in Caenorhabditis elegans
Source: eLife. 2025 Sep 10;13:RP94310. doi: 10.7554/eLife.94310 (PMC12422736; doi:10.7554/eLife.94310)
Supplement: Figure 6—figure supplement 1—source data 1. [file elife-94310-fig6-figsupp1-data1.xlsx]

## Sheet: F6S1A
	GFP	ufd-1	GFP+ufd-1	cpr-1+ufd-1	cpr-4+ufd-1	Y71H2AR.25+ufd-1	asp-12+ufd-1	asp-17+ufd-1	F19C7.2+ufd-1
	39.6608	2.2821	14.5617	13.9227	9.29522	2.31148	12.1906	37.2279	31.0545
	88.1874	5.26555	41.4826	11.2271	11.167	32.3105	18.2205	19.5799	22.0465
	36.5562	4.06919	12.9164	10.767	9.97557	8.58999	24.1531	40.2186	14.1468
	40.2078	13.6137	14.5997	18.7172	19.9241	20.8713	25.3873	9.27055	16.7035
	60.9794	57.1428	16.8846	44.7197	24.7301	47.8969	19.766	8.02313	12.8518
	43.1866	25.3202	2.31623	40.8774	44.9062	20.4978	41.77	27.0909	5.41861
	39.7064	12.4504	13.9199	18.9249	16.6491	14.4538	13.5412	29.6318	18.5458
	87.1034	15.9068	19.1209	15.389	27.7435	53.1603	26.8406	8.58596	16.8773
	50.2657	8.95888	0.26501	36.1151	21.1215	12.7419	5.0393	11.1227	27.8343
	61.2427	19.1798	32.4546	8.91011	14.4805	9.78742	11.5429	17.7907	12.4257
	16.2029	14.4124	7.39381	18.488	1.65022	6.58919	13.1106	11.6108	1.76584
	8.61504	33.5774	5.77318	26.1418	7.47515	7.98917	20.968	5.93147	3.1476
	35.9062	11.2629	2.86192	39.7071	8.36411	15.2245	15.9325	12.2361	9.14078
	19.6468	9.40492	10.4955	87.3763	8.30005	33.185	17.6102	16.7058	5.18949
	30.0452	3.89907	15.8228	99.5271	8.68827	34.5077	64.8028	10.6239	15.3357
	34.9625	3.51375	8.38932	32.8832	10.6327	10.425	13.0608	6.09889	11.3285
	57.8507	5.73746	1.42887	36.2066	8.11676	5.02123	9.52295	19.8983	3.95994
	49.0081	9.27023	4.54924	19.2507	12.0454	10.7314	8.60883	12.0518	6.18091
	63.2144	8.26703	25.7294	27.3331	36.0967	21.412	32.6668	20.7816	41.2777
	54.7039	14.0877	6.90306	22.2475	47.2565	14.3888	38.403	32.0904	30.6145
	24.7031	7.77211	38.9513	42.7146	24.7934	59.6225	51.4504	55.5656	27.2993
	24.3793	13.361	20.7731	37.0995	71.0251	39.8904	24.5176	52.5627	17.004
	61.5803	4.57122	8.40273	35.8048	23.7537	60.6715	39.2846	10.5445	17.1202
	33.9215	5.12508	12.7342	32.0674	29.934	48.6401	35.7499	24.6599	52.8815
	69.4634	10.4331	33.0198	65.6031	26.1922	22.9079	37.905	8.63757	32.29
	64.3212	18.8462	12.551	64.4115	37.4619	9.08937	16.4507	50.5	48.6216
	33.7929		20.0897	19.3053	39.7513	52.3723	49.581	14.1537	46.2489
			33.5996	27.8536	35.7683	25.7323	16.81	11.8562	45.2417
			4.18466	43.5195	9.41696			23.7058
				46.5128
Mean	45.53	12.99	15.25	34.79	22.3	25.04	25.17	20.99	21.16
Std. Deviation	20.07	11.53	11.52	21.53	15.71	18.02	14.82	14.31	14.96

## Sheet: F6S1B
	GFP	ufd-1	GFP+ufd-1	pals-3+ufd-1	pals-4+ufd-1	pals-5+ufd-1	pals-6+ufd-1	pals-9+ufd-1	pals-14+ufd-1	pals-16+ufd-1	pals-17+ufd-1	pals-27+ufd-1	pals-29+ufd-1	pals-30+ufd-1	pals-32+ufd-1	pals-33+ufd-1	pals-38+ufd-1
	49.0081	9.27023	6.90306	10.9208	9.90045	7.29217	44.9982	51.6409	75.8611	14.2745	29.3361	5.8922	1.15323	10.69	11.3249	0.732979	2.07155
	63.2144	8.26703	38.9513	37.3162	25.628	17.8584	5.87556	17.766	35.4245	32.8992	13.7536	17.695	16.9175	22.8389	6.63814	5.58136	37.9659
	54.7039	14.0877	20.7731	38.4406	12.039	21.8333	86.3106	7.69468	65.71	14.323	18.0481	6.61767	17.5828	39.2212	35.2865	9.74095	3.98923
	24.7031	7.77211	8.40273	42.1134	17.638	40.4878	46.7433	7.55007	49.1729	32.2238	15.8288	0.715065	14.7557	8.21989	18.0936	1.3398	1.86309
	24.3793	13.361	12.7342	2.87078	10.4442	10.8527	38.8225	20.6995	38.3357	27.5534	14.1373	18.8454	10.0879	28.6092	44.883	5.11511	1.69597
	61.5803	4.57122	33.0198	50.2815	48.8029	4.53146	40.5594	67.4871	19.1147	8.89934	12.5543	11.8784	30.4506	12.578	21.3912	2.81847	8.30485
	33.9215	5.12508	12.551	17.4337	13.6268	27.2258	46.4054	19.4874	25.3305	23.394	12.5948	41.1659	26.2758	26.9196	18.1147	5.75425	25.2309
	69.4634	10.4331	20.0897	50.1451	13.5788	46.9591	30.6176	14.8949	31.8387	28.6855	28.5097	7.69246	25.1818	29.3056	4.39156	5.05032	18.5034
	64.3212	18.8462	33.5996	18.2004	43.6223	6.54778	33.4789	64.9223	31.6973	24.0519	41.2911	13.8048	29.3403	25.2272	7.38244	15.6056	22.074
	33.7929	5.84955	4.18466	16.1306	11.5644	6.48405	28.3237	70.8231	41.2384	47.503	12.8573	28.3253	49.5641	2.50895	36.4883	0.21839	22.5874
	80.0001	11.4643	5.90133	5.98391	28.2631	12.792	5.92773	41.3873	22.3986	63.9365	36.8811	15.9133	58.5821	11.8229	12.8026	13.7091	10.4924
	130.879	28.6777	13.0627	11.4771	26.9371	9.76556	6.0635	38.3733	24.3529	15.6801	23.6874	11.4529	30.7316	19.3844	61.1296	33.6911	22.9721
	61.6116	35.3441	16.2758	9.93704	32.8431	14.2298	4.92928	60.547	9.86433	56.7039	29.5791	26.9718	25.0752	38.4507	12.2939	19.6373	61.6745
	151.647	36.2761	8.71226	15.917	48.2714	6.76908	8.63436	36.3743	22.2692	59.557	32.3375	20.2384	43.2694	10.6824	13.469	11.839	13.4706
	80.5006	65.839	18.922	33.5422	24.9524	10.704	11.303	29.9207	22.2532	82.1719	40.3181	38.2961	18.8428	15.3114	38.0814	42.5894	23.283
	125.249	12.3779	10.8769	24.3043	24.7322	3.14409	18.2081	20.5615	19.5887	12.2354	14.7722	19.3785	21.3232	12.7922	69.8274	11.3187	33.2382
	80.9616	19.7678	16.8218	14.9673	37.6223	3.8525	21.7164	12.1131	57.3101	20.9384	32.7314	38.0488	48.2623	12.8891	15.0881	17.8068	35.3322
	74.4472	11.2311	36.8956	27.8243	21.2875	4.78525	12.0706	29.0733	14.0214	42.7375	89.0751	31.6088	52.8234	30.8223	17.7552	17.2063	17.0319
	82.2823	60.873	31.0115	8.50317	18.4042	2.6759	19.2871	8.75732	26.2155	36.0946	57.4342	17.2293	33.5262	14.2869	42.2515	12.269	27.9614
	84.9372		17.3263	18.1382	24.0903	5.48781	6.64199	7.4811	16.0555	7.16691	23.7139		33.9177	30.3492	7.94364	20.6512	43.1969
Mean	71.58	19.97	18.35	22.72	24.71	13.21	25.85	31.38	32.4	32.55	28.97	19.57	29.38	20.15	24.73	12.63	21.65
Std. Deviation	33.83	17.93	10.81	14.54	12.25	12.3	20.73	21.57	17.67	20.52	18.62	11.71	15.04	10.45	18.73	10.89	15.56
