# Supplementary material for: Inhibition of the UFD-1-NPL-4 complex triggers an aberrant immune response in Caenorhabditis elegans
Source: eLife. 2025 Sep 10;13:RP94310. doi: 10.7554/eLife.94310 (PMC12422736; doi:10.7554/eLife.94310)
Supplement: Figure 6—figure supplement 2—source data 1. [file elife-94310-fig6-figsupp2-data1.xlsx]

## Sheet: F6S2A
					GFP	ufd-1	GFP+elt-2	GFP+ufd-1	ufd-1+elt-2
					1	0.267325	1.29834	0.343092	0.300062
					1	0.262429	0.211198	0.202127	0.303549
					1	0.607097	0.529732	0.338368	0.659754
					1	0.56383	1.28046	0.258816	0.5
				Mean	1	0.4252	0.8299	0.2856	0.4408
				Std. Deviation	0	0.1859	0.5463	0.06776	0.1733
