# Supplementary material for: Inhibition of the UFD-1-NPL-4 complex triggers an aberrant immune response in Caenorhabditis elegans
Source: eLife. 2025 Sep 10;13:RP94310. doi: 10.7554/eLife.94310 (PMC12422736; doi:10.7554/eLife.94310)
Supplement: Figure 6—figure supplement 3—source data 1. [file elife-94310-fig6-figsupp3-data1.xlsx]

## Sheet: F6S3B
					N2	elt-2_OE
					70.2007	9.88597
					62.626	34.095
					56.9935	15.0119
					67.9322	20.4877
					55.9391	24.2966
					67.4343	34.0373
					55.3284	21.2516
					59.1036	25.3031
					53.3971	19.0069
					48.6258	16.173
					105.806	14.1491
					35.5529	24.5168
					70.5152	11.2137
					86.9706	15.5169
					71.0406	10.5118
					61.9685	25.4465
					70.7768	16.2927
					42.1779	9.96733
					45.7867	32.746
					29.5576	28.1503
					45.8012	23.7285
					76.0357	10.2
					49.3277	25.5511
					73.4352	21.8718
					56.2663	21.2552
					35.1665	18.5038
					32.3473	38.6678
					53.8761	22.5029
					49.7667	29.8424
					62.9877	38.2514
					68.2102	26.7458
					56.8604	40.2736
				Mean	58.68	22.67
				Std. Deviation	16.06	8.731

## Sheet: F6S3C
	Experiment #	Strain	Genotype	RNAi	Mean survival(hours)	# Deaths/total before censoring	Control for comparison	p value with respect to control	% Survival extension (compared to control)
		N2
	1	elt-2_OE	jsnEx3 [elt-2p::elt-2 + myo-2p::mCherry]		56	93/96
					45.6	89/92	N2	0.0004	-18.5714
		N2			48.6	82/90
	2	elt-2_OE	jsnEx3 [elt-2p::elt-2 + myo-2p::mCherry]		46.7	90/91	N2	0.7906	-3.90947
		N2			53.7	79/91
	3	elt-2_OE	jsnEx3 [elt-2p::elt-2 + myo-2p::mCherry]		54.1	87/92	N2	0.6935	0.744879
