# Supplementary material for: Inhibition of the UFD-1-NPL-4 complex triggers an aberrant immune response in Caenorhabditis elegans
Source: eLife. 2025 Sep 10;13:RP94310. doi: 10.7554/eLife.94310 (PMC12422736; doi:10.7554/eLife.94310)
Supplement: Figure 6—source data 1. [file elife-94310-fig6-data1.xlsx]

## Sheet: Figure-6D
		N2
		GFP	ufd-1	GFP+elt-2	GFP+ufd-1	ufd-1+elt-2
		33.1771	35.4838	76.5355	45.6628	62.4397
		37.3426	15.201	92.2061	3.82041	43.1124
		32.7861	49.2068	119.662	26.4416	61.1739
		41.6917	12.1826	171.092	2.93851	116.203
		41.2869	15.2944	119.189	39.784	48.4015
		39.6611	13.0152	121.361	80.7974	81.8977
		43.752	5.25651	35.7213	24.8188	74.9763
		130.31	6.72597	40.5362	16.1893	16.945
		55.9529	49.0656	23.5871	9.73752	67.9191
		13.3447	25.5276	104.143	19.0181	7.72398
		39.3433	19.5632	84.3696	9.45117	91.1869
		6.53293	2.80976	93.2156	26.6258	116.767
		29.252	12.6596	110.543	17.0849	85.0757
		90.7576	4.74604	119.838	4.19444	63.1361
		59.1267	1.99528	110.155	49.41	60.3093
		32.657	4.6543	73.8293	4.66136	61.7459
		51.2727	4.52616	111.68	18.8637	52.2942
		27.0604	19.2329	93.9968	3.70705	25.0508
		37.7338	4.77003	103.63	7.371	117.372
		44.162	5.01197	186.858	6.47679	16.9552
		32.1011	1.99393	102.142	18.3825	55.2721
		66.254	29.6873	148.778	6.99268	34.0275
		25.4553	29.9438	64.5299	26.6668	42.2483
		68.4471	12.5323	141.167	9.07873	36.3752
		67.2839	13.0312	168.708	10.4614	28.0685
		31.223	4.13083	147.461	7.46617	77.5076
		85.4463	15.626	141.689	2.9057	16.6098
		81.4501	3.5145	119.029	17.6409	30.4269
		111.203	4.05092	72.7084	25.552
		75.1592	1.11578	162.172	58.3679
	Mean	51.04	14.09	108.7	20.02	56.83
	Std. Deviation	28.05	13.24	40.03	18.56	30.78

## Sheet: Figure-6F
	sek-1(km4)
	GFP	ufd-1	GFP+ufd-1	GFP+elt-2	ufd-1+elt-2
	62.7359	8.4693	7.54015	67.2406	11.8161
	55.3175	7.80509	0.690213	46.1559	43.2543
	12.0159	2.07648	2.96307	22.8766	68.6088
	72.628	1.82616	2.12663	95.9674	47.5032
	63.3868	13.121	2.09324	95.1758	19.8369
	50.6112	56.7423	35.736	65.9432	49.4764
	66.8197	3.44758	13.6135	52.9689	15.7838
	58.6595	4.44423	34.8432	57.1039	44.1506
	54.2394	28.9007	3.9819	62.7161	60.4803
	44.691	7.0399	8.64698	136.452	30.7713
	64.05	31.4998	18.5831	14.3645	43.7291
	49.1562	5.76354	19.467	36.8621	27.9348
	43.9047	55.8501	8.1589	37.2182	53.2873
	44.2511	4.29995	37.0731	127.103	6.69041
	89.9607	5.88903	6.58132	91.4598	27.5605
	58.8374	14.8081	3.29686	57.1578	16.3427
	24.5288	5.61096	4.42595	13.3842	52.3034
	63.8561	19.6734	23.4496	51.7369	16.7293
	43.5162	4.53511	32.8128	26.0686	60.9005
	83.5155	38.8475	4.60847	105.377	20.663
	47.3199	8.5179	9.53457	54.5982	3.07446
	27.7787	6.81532	15.696	98.8897	52.1013
	26.3728	4.74837	20.4977	64.2761	31.4738
	96.3917	8.08207	21.6037	120.147	11.5154
	50.5321	18.9203	8.18159	36.3034	47.5767
	39.5452	35.3684	4.52442	65.9436	19.6288
	19.0361	7.11354	3.50999	45.7958	43.8754
	30.8125	6.78347	10.3008	74.8179	31.0646
	79.1336	4.63439	4.2425	88.8953	35.0677
	29.5563	2.99926	5.36748	70.1135	42.4163
					24.6396
Mean	51.77	14.15	12.47	66.1	34.2
Std. Deviation	20.76	15.25	11.05	32.27	17.45

## Sheet: Figure-6G
		Experiment #	Strain	Genotype	RNAi	Mean survival(hours)	# Deaths/total before censoring	Control for comparison	p value with respect to control	% Survival extension (compared to control)
		1	KU4	sek-1(km4)	GFP	12.49	90/90
			KU4	sek-1(km4)	ufd-1	30.09	86/90	GFP	<0.0001	140.913
			KU4	sek-1(km4)	GFP+ufd-1	27.9	89/90	GFP	<0.0001	123.379
			KU4	sek-1(km4)	GFP+elt-2	12.004	90/90
			KU4	sek-1(km4)	ufd-1+elt-2	16.91	89/90	GFP+ufd-1	<0.0001	-39.3907
		2	KU4	sek-1(km4)	GFP	10.38	90/90
			KU4	sek-1(km4)	ufd-1	27.2	87/90	GFP	<0.0001	162.042
			KU4	sek-1(km4)	GFP+ufd-1	27.7	90/90	GFP	<0.0001	166.859
			KU4	sek-1(km4)	GFP+elt-2	16.3	90/90
			KU4	sek-1(km4)	ufd-1+elt-2	15.7	90/90	GFP+ufd-1	<0.0001	-43.3213
		3	KU4	sek-1(km4)	GFP	11.9	90/90
			KU4	sek-1(km4)	ufd-1	31.9	90/90	GFP	<0.0001	168.067
			KU4	sek-1(km4)	GFP+ufd-1	31.9	90/90	GFP	<0.0001	168.067
			KU4	sek-1(km4)	GFP+elt-2	12.3	90/90
			KU4	sek-1(km4)	ufd-1+elt-2	15.6	90/90	GFP+ufd-1	<0.0001	-51.0972
